# Supplementary material for: Antimicrobial Profile of Actinomycin D Analogs Secreted by Egyptian Desert Streptomyces sp. DH7
Source: MDPI journal article supplement (doi:10.3390/antibiotics10101264), 2021-10-18
Supplement: s1 [file s1]

Article

# Antimicrobial Profile of Actinomycin D Analogs Secreted by Egyptian Desert *Streptomyces* sp. DH7

Dina H. Amin <sup>1,\*</sup>, Hayam A. E. Sayed <sup>1</sup>, Ahmed M. Elissawy <sup>2,3</sup>, Dina E. EL-Ghwas <sup>4</sup> and Abdel Nasser B. Singab <sup>2,3</sup>

<sup>1</sup> Department of Microbiology, Faculty of Science, Ain Shams University, Cairo 11566, Egypt; hayam84@sci.asu.edu.eg

<sup>2</sup> Department of Pharmacognosy, Faculty of Pharmacy, Ain Shams University, Cairo 11566, Egypt; ae-lissawy@pharma.asu.edu.eg (A.M.E.); dean@pharma.asu.edu.eg (A.N.B.S.)

<sup>3</sup> Center of Drug Discovery Research and Development, Faculty of Pharmacy, Ain Shams University, Cairo, 11566, Egypt

<sup>4</sup> Pharmaceutical Industries Researches Division, Department of Chemistry of Natural and Microbial Products, National Research Centre, Giza 12622, Egypt; dinaelghwas7781@yahoo.com

\* Correspondence: dina.hatem@sci.asu.edu.eg

## Supplementary Materials

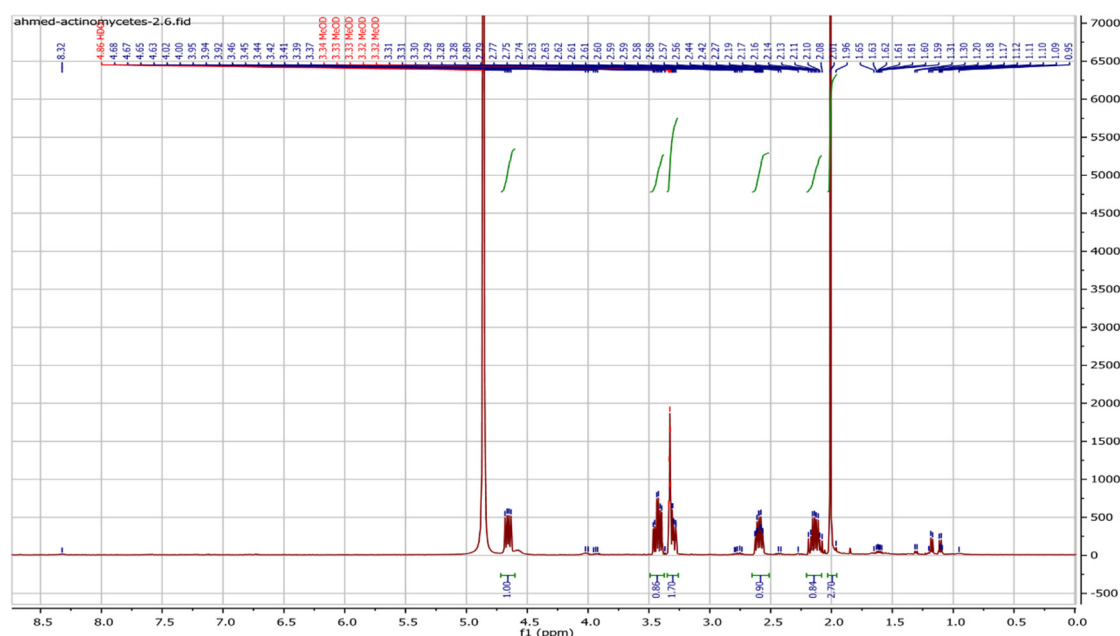

Figure S1. <sup>1</sup>H NMR spectrum of compound 1.

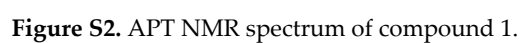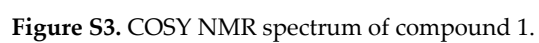

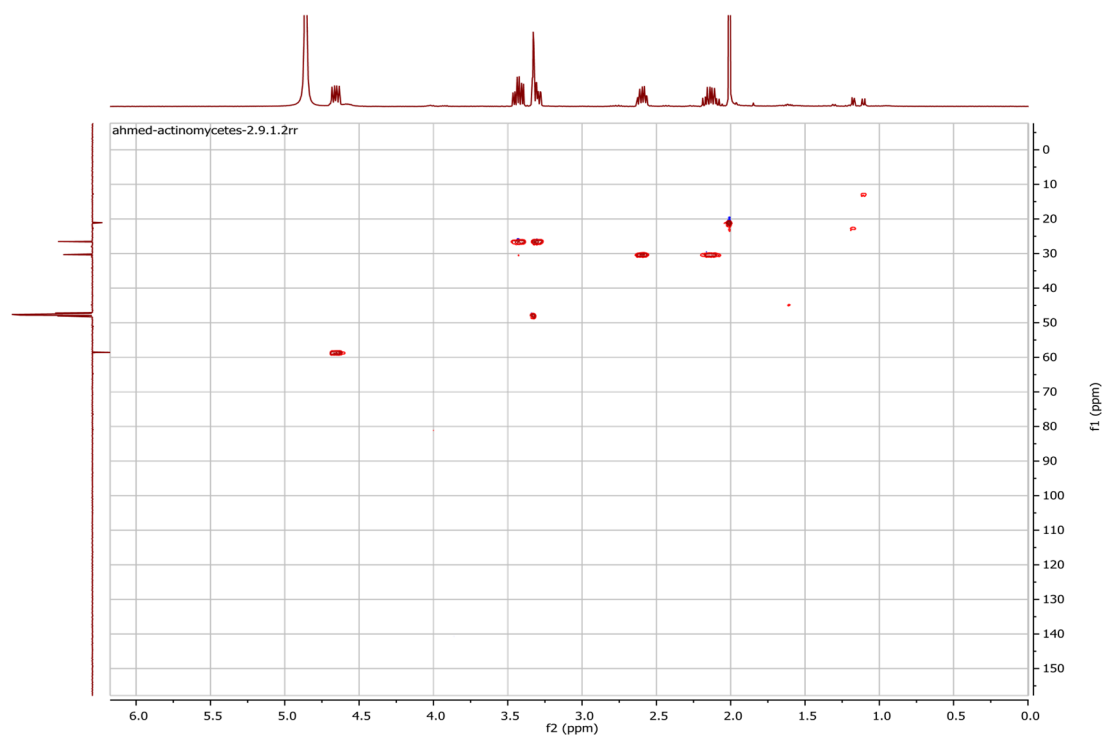

Figure S4. HSQC NMR spectrum of compound 1.

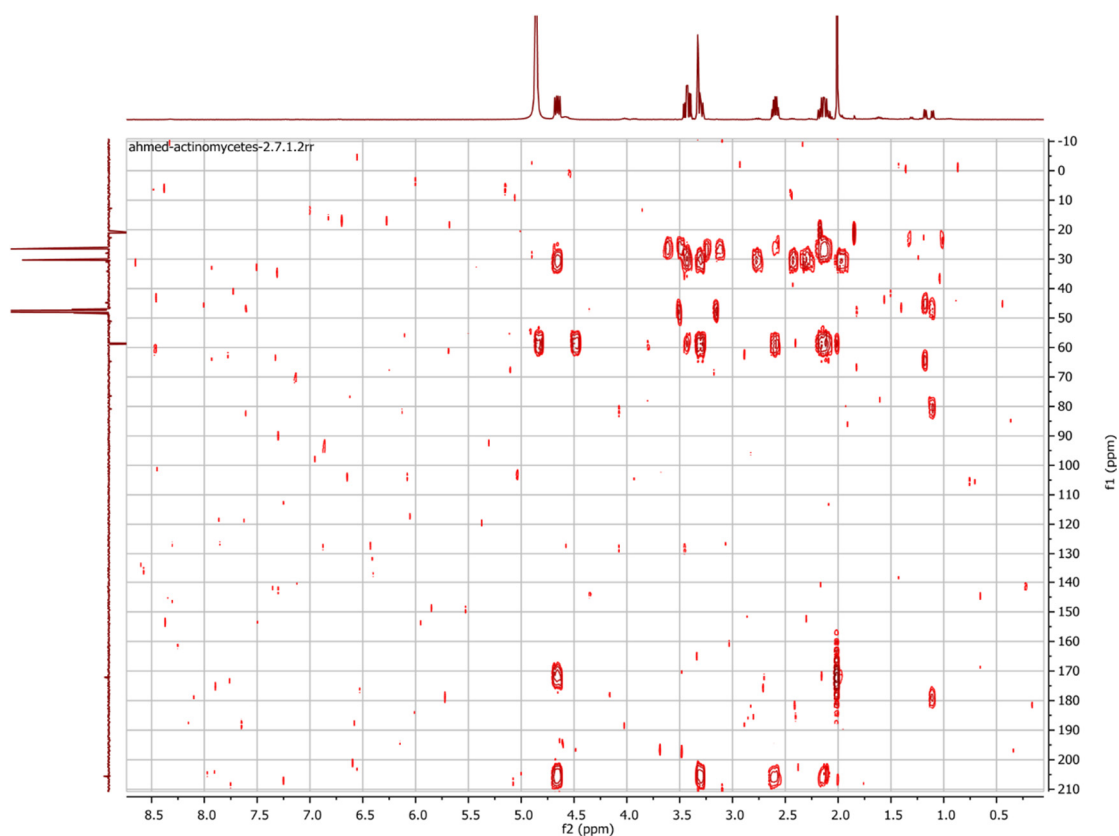

Figure S5. HMBC NMR spectrum of compound 1.

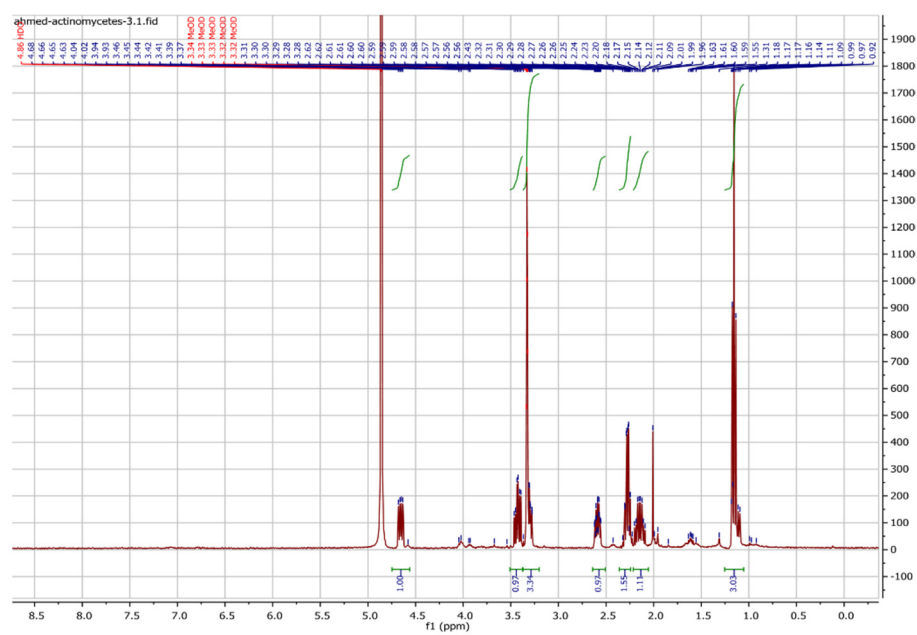

Figure S6. <sup>1</sup>H NMR spectrum of compound 2.

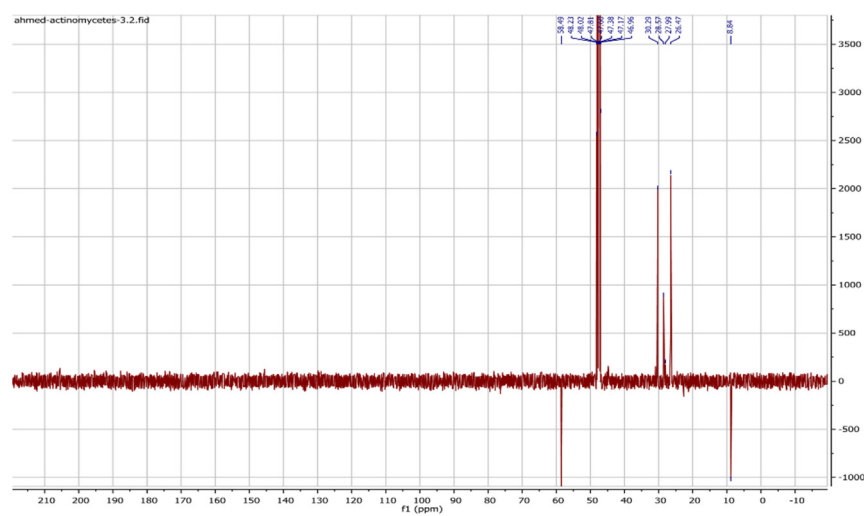

Figure S7. APT NMR spectrum of compound 2.

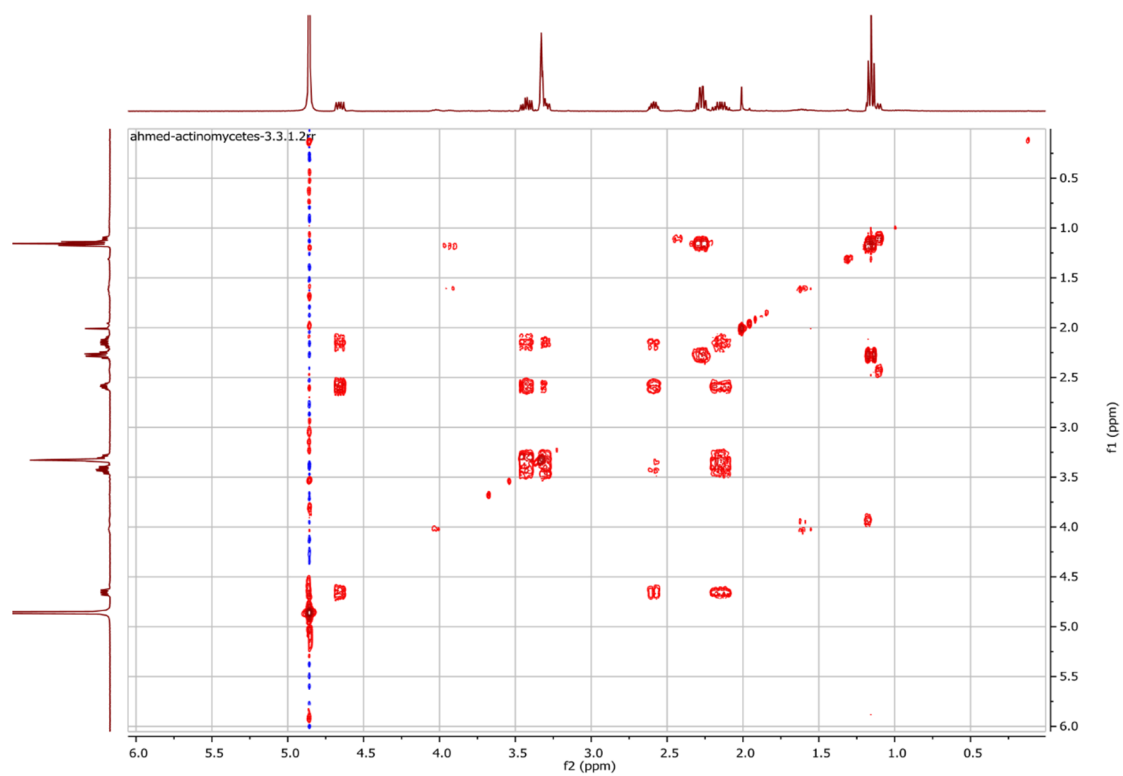

Figure S8. COSY NMR spectrum of compound 2.

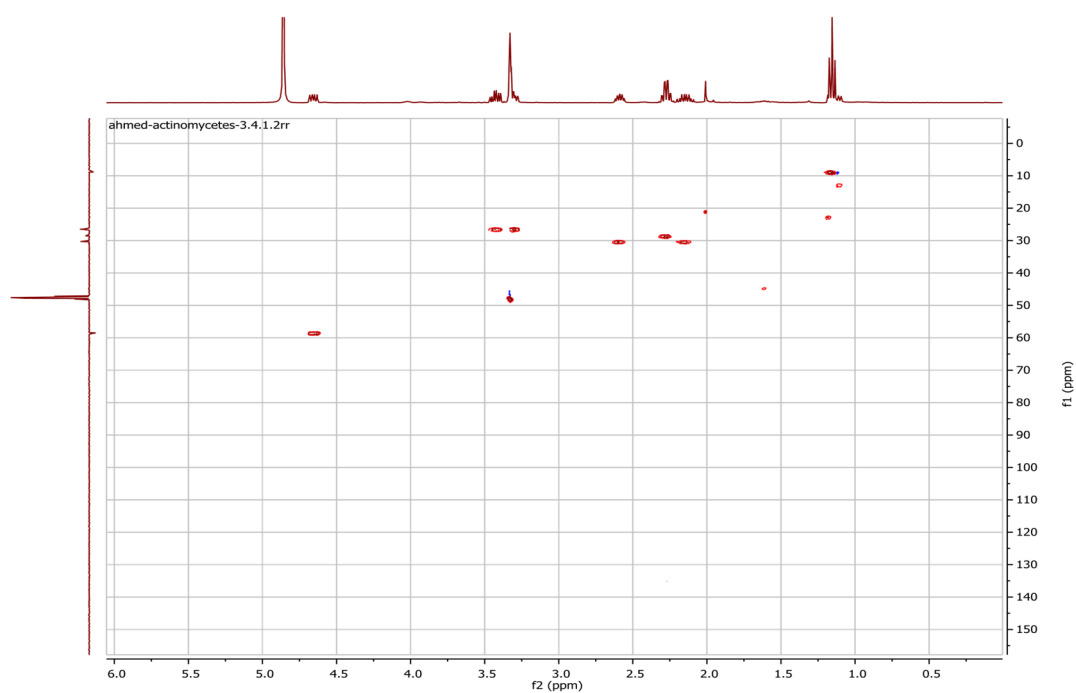

Figure S9. HSQC NMR spectrum of compound 2.

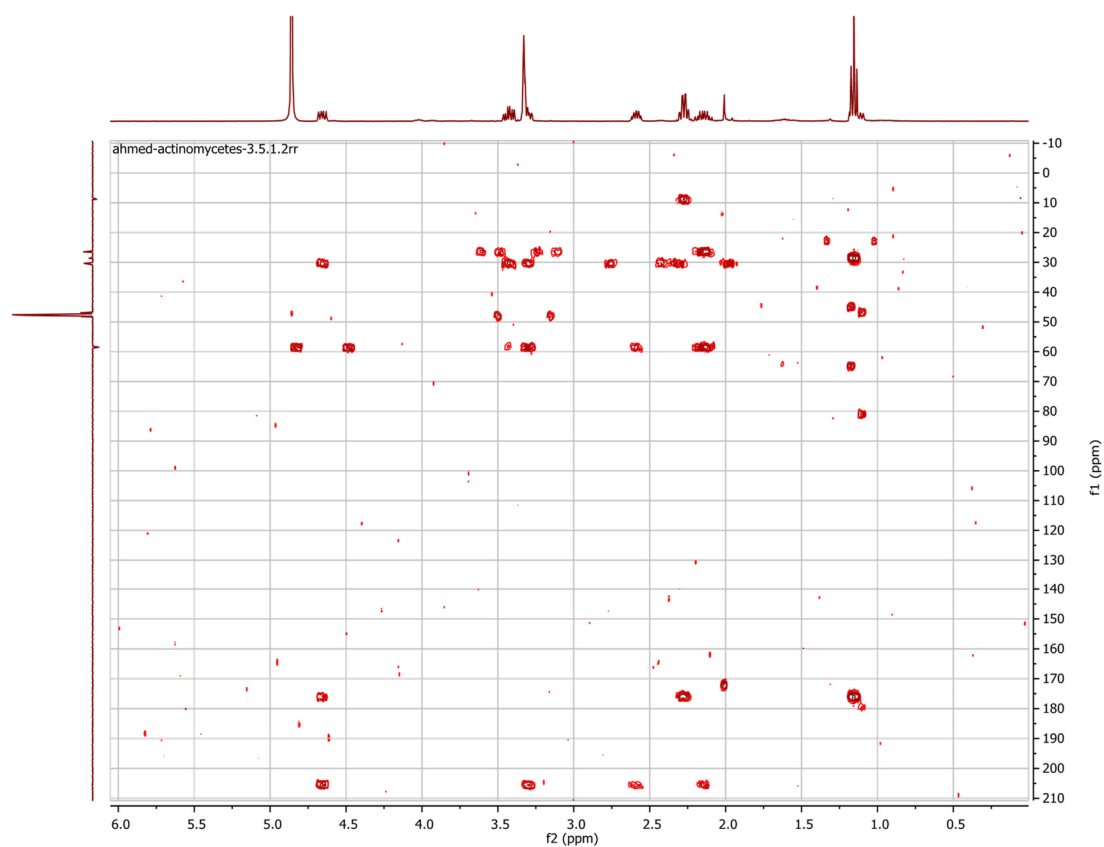

Figure S10. HMBC NMR spectrum of compound 2.

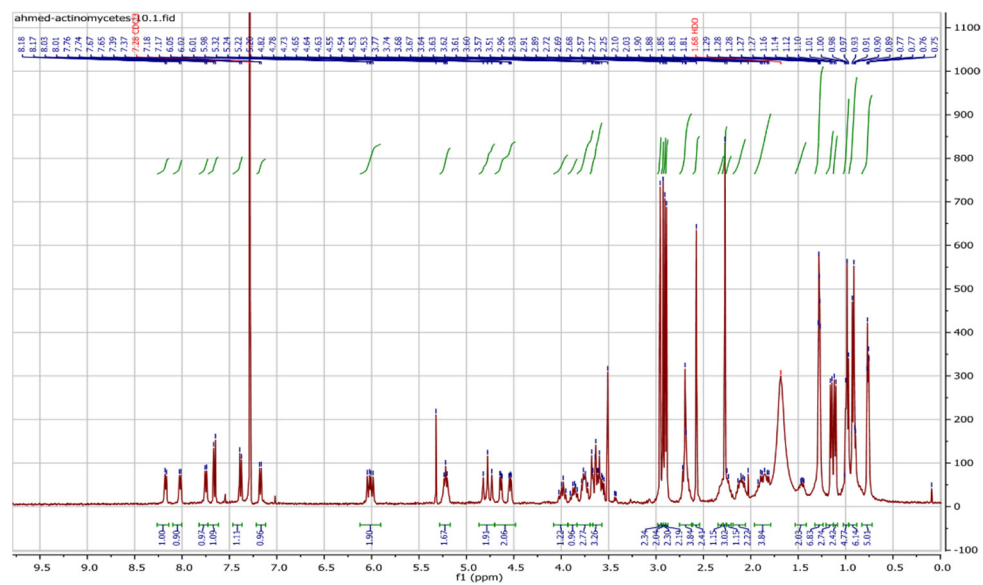

Figure S11. <sup>1</sup>H NMR spectrum of compound 3.

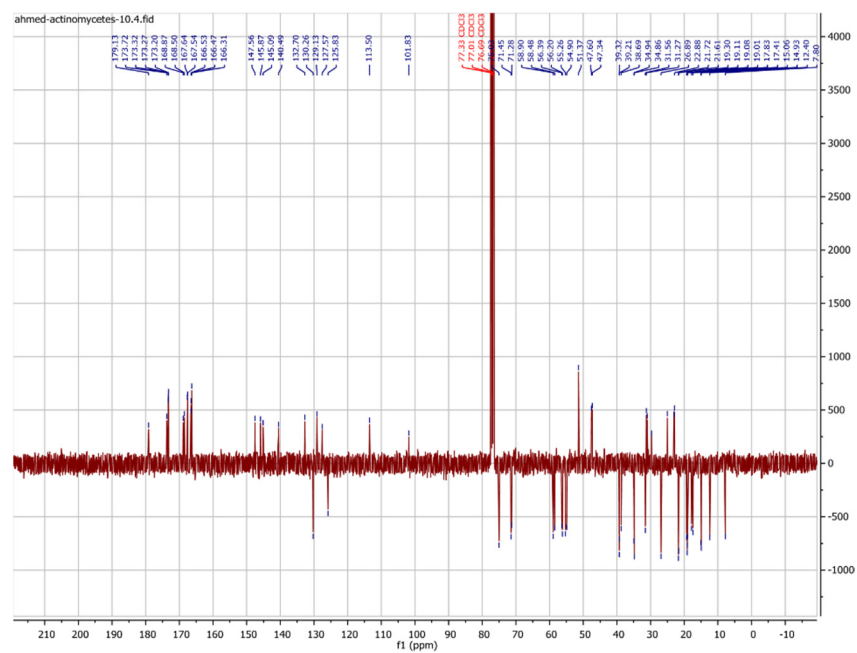

Figure S12. APT NMR spectrum of compound 3.

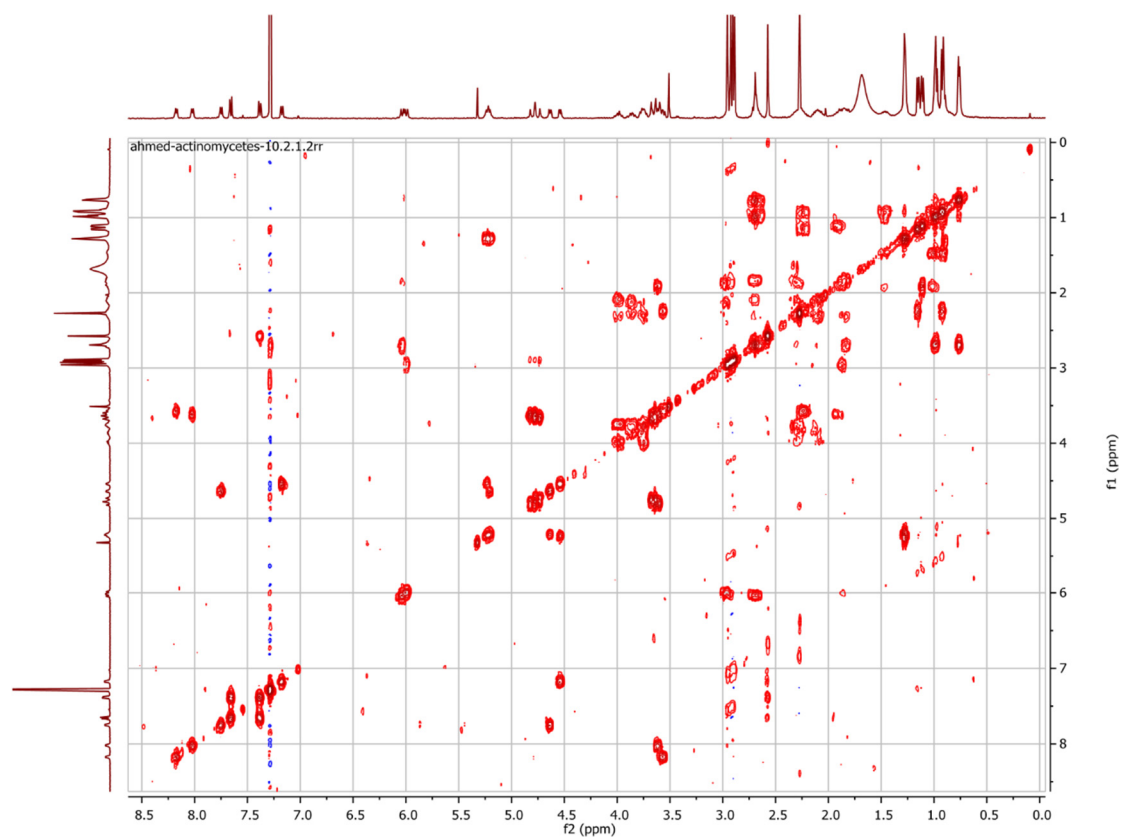

Figure S13. COSY NMR spectrum of compound 3.

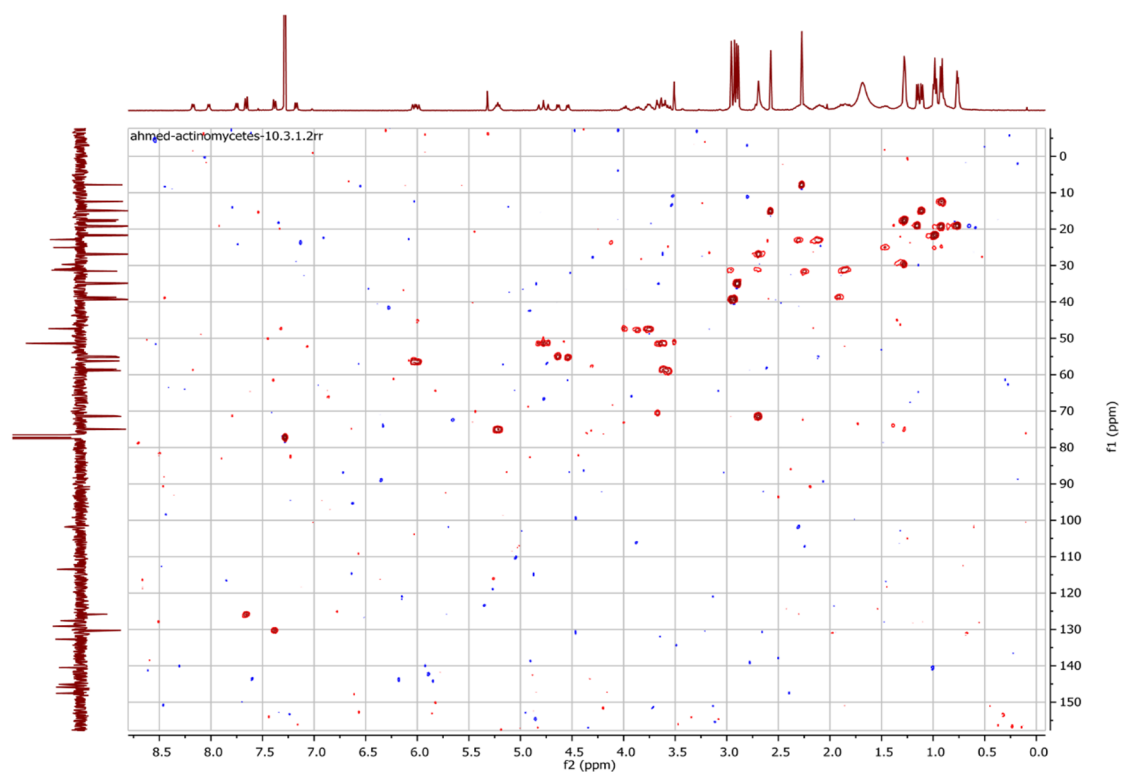

Figure S14. HSQC NMR spectrum of compound 3.

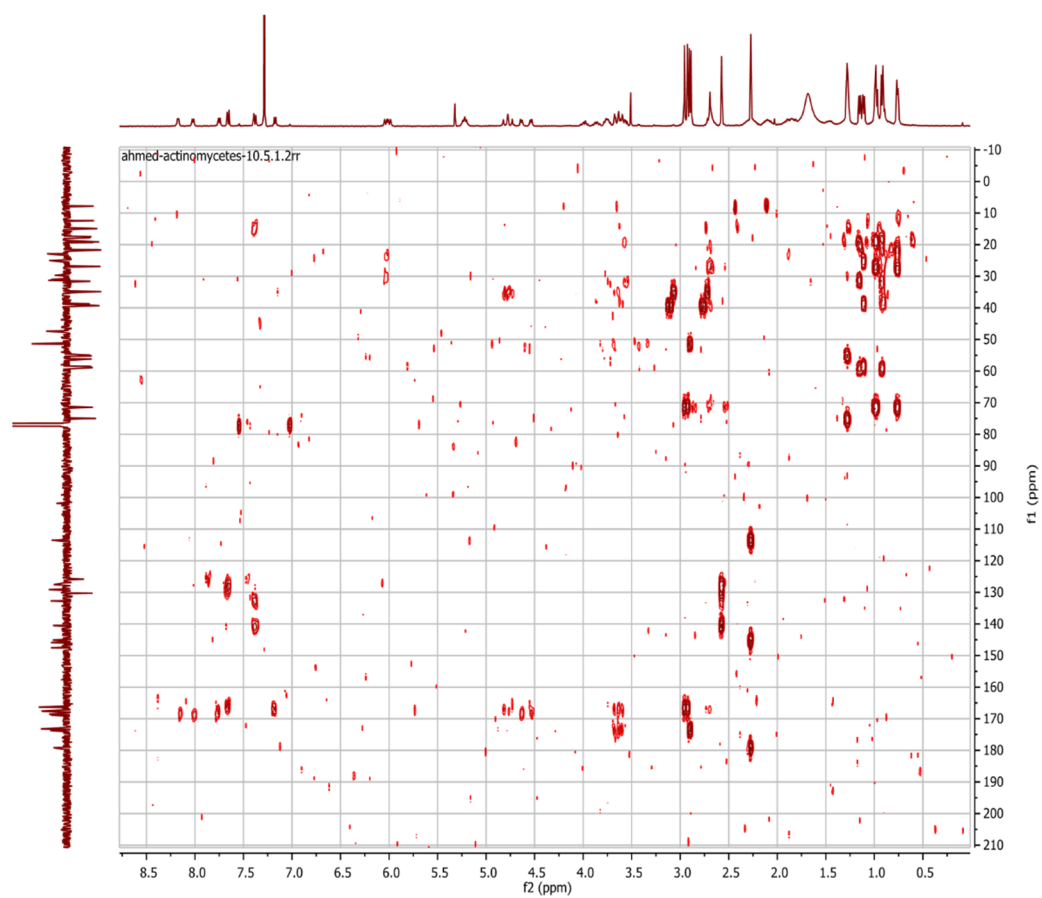

Figure S15. HMBC NMR spectrum of compound 3.



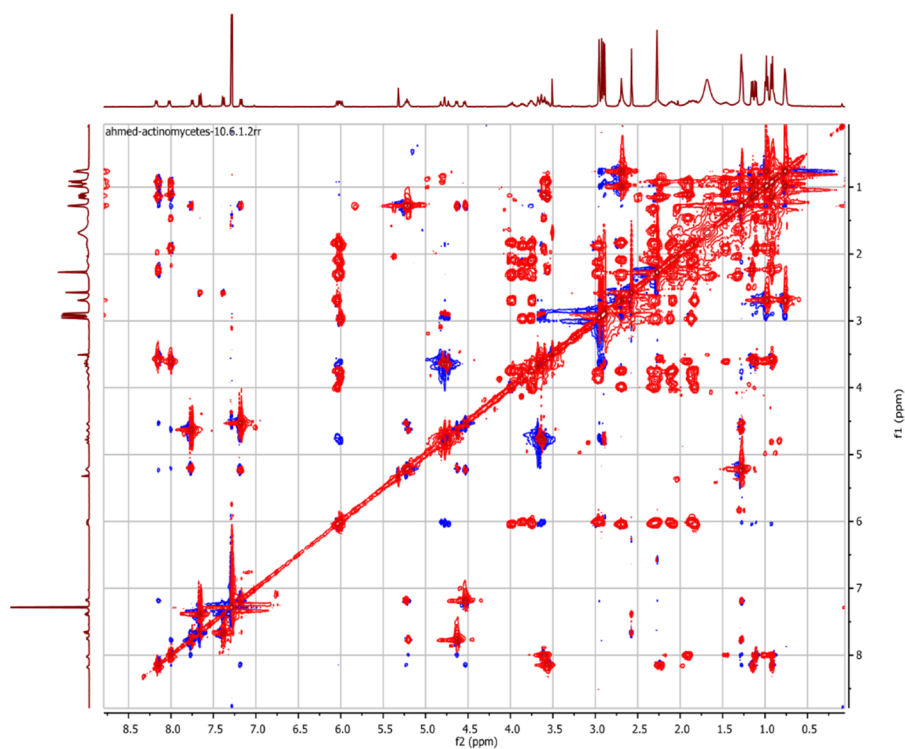

Figure S16. TOCSY NMR spectrum of compound 3.

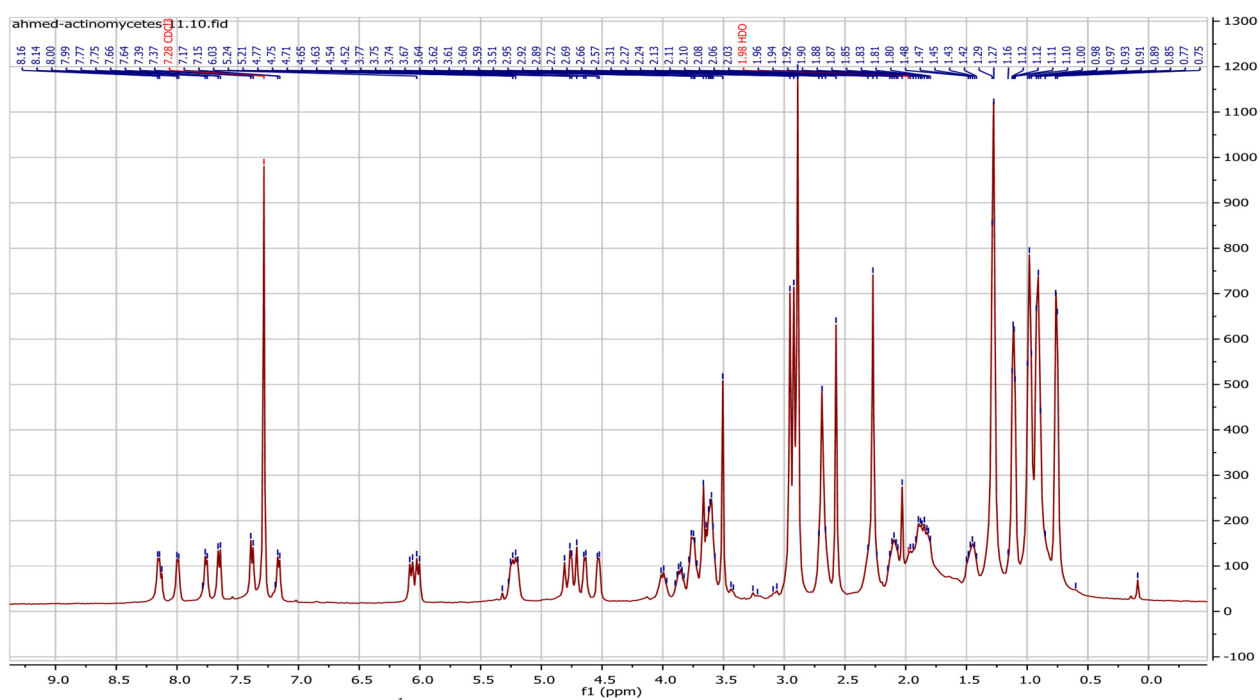

Figure S17.  $^1\text{H}$  NMR spectrum of compound 4.

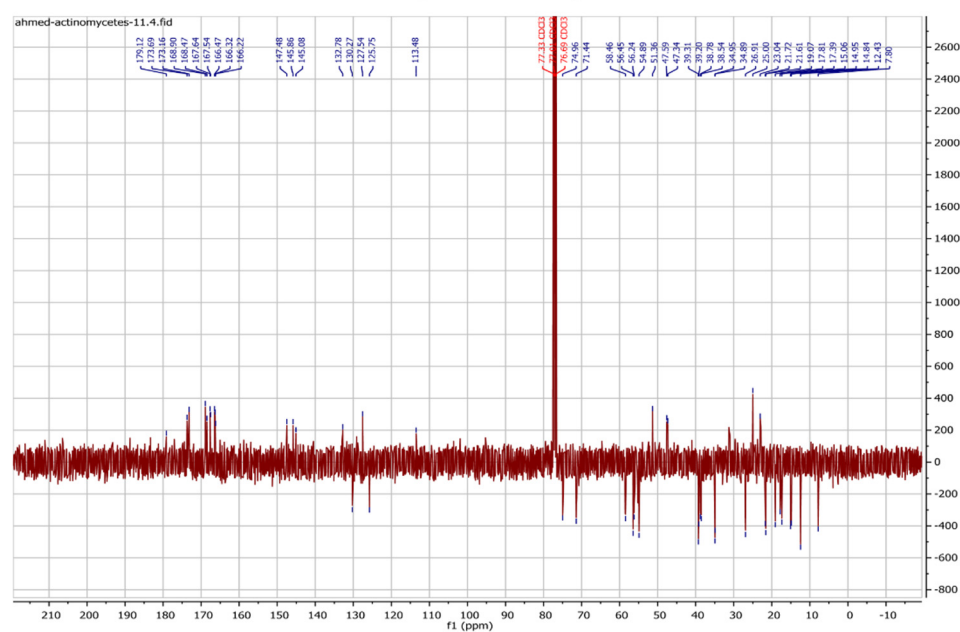

Figure S18. APT NMR spectrum of compound 4.

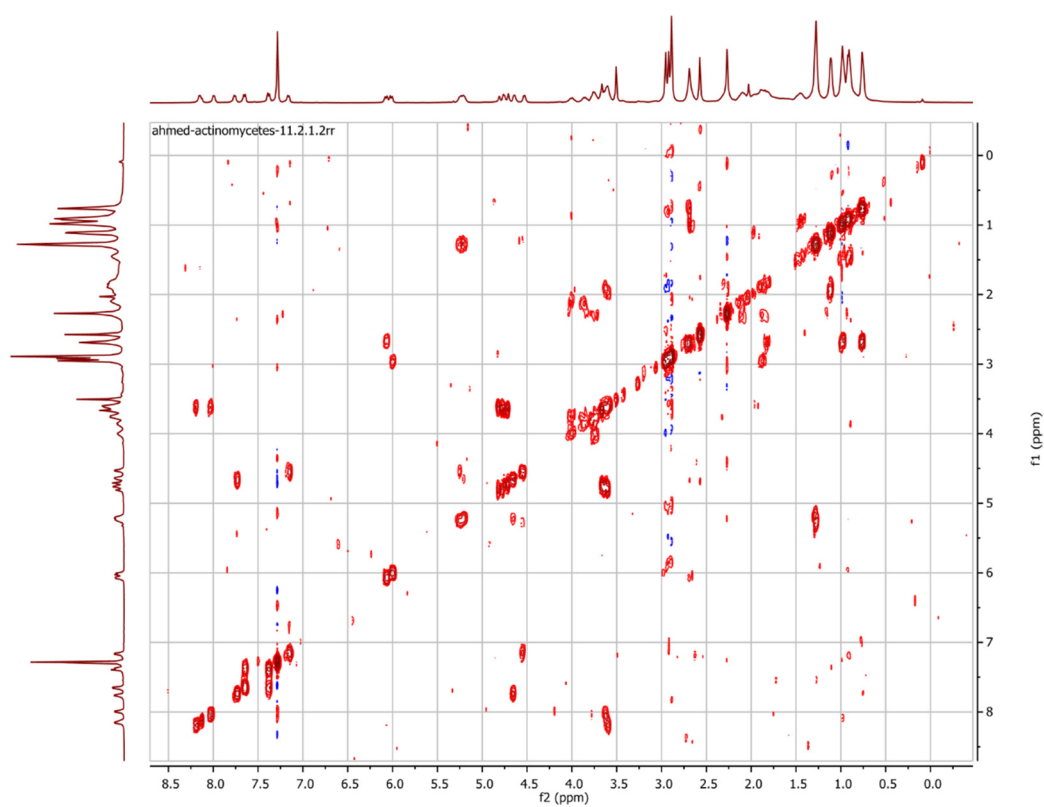

Figure S19. COSY NMR spectrum of compound 4.

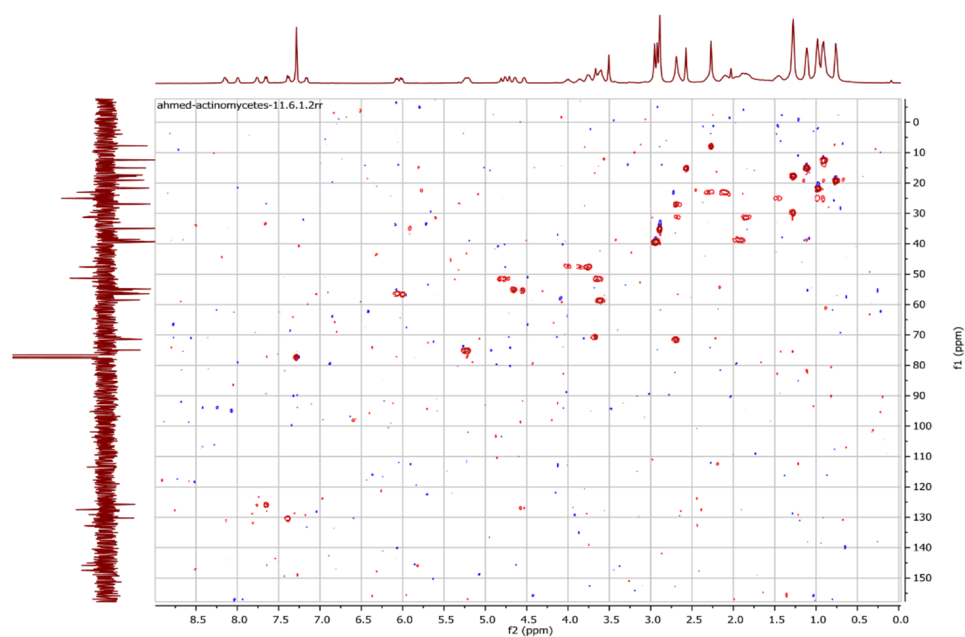

Figure S20. HSQC NMR spectrum of compound 4.

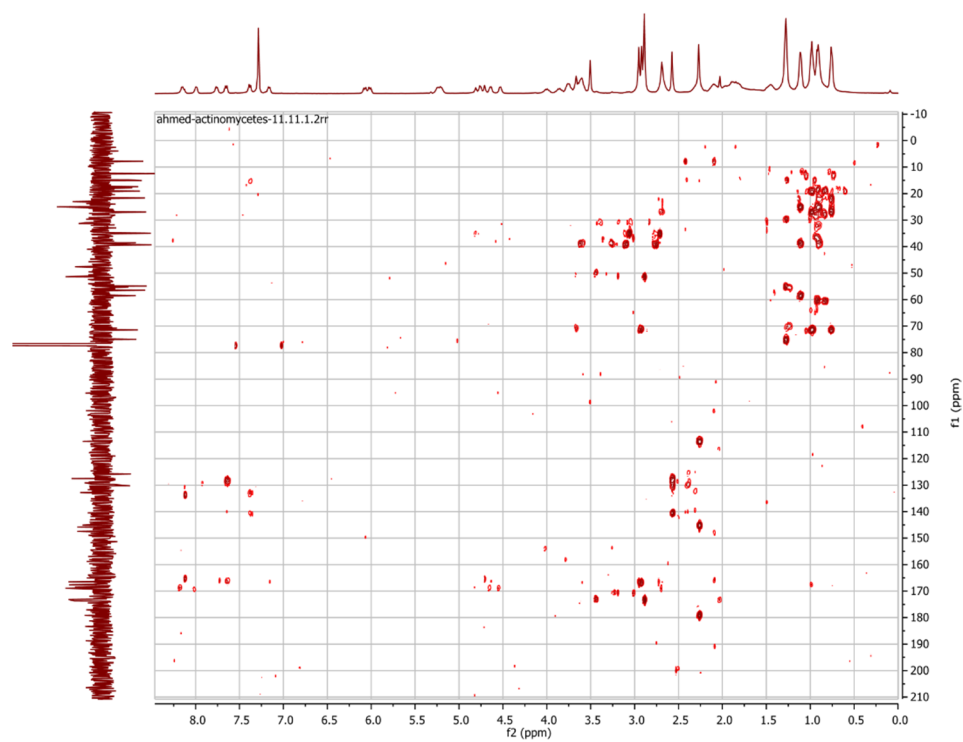

Figure S21. HMBC NMR spectrum of compound 4.

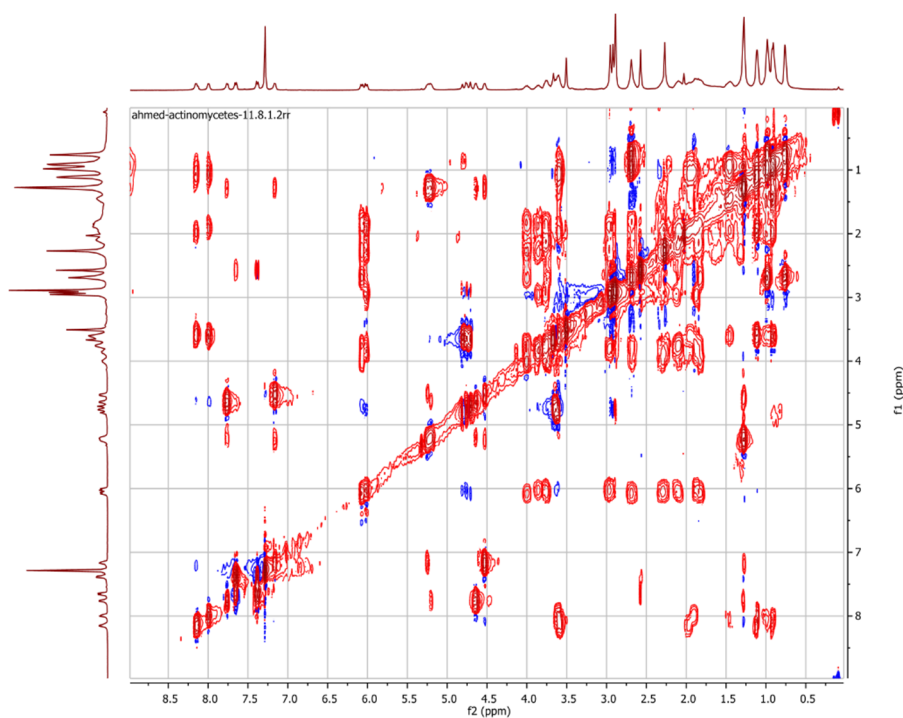

**Figure S22.** TOCSY NMR spectrum of compound 4.

**Table S1.** Identification of bacterial strains using MALDI/TOF (Matrix-assisted laser desorption ionization/ time-of-flight), showing score values.

| Isolate's code | Organism Identification      | Score value | Category | Symbol | NCBI Identifier |
|----------------|------------------------------|-------------|----------|--------|-----------------|
| 30             | <i>Staphylococcus aureus</i> | 2.12        | A        | ++     | 1280            |
| 34             | <i>Staphylococcus aureus</i> | 2.18        | A        | ++     | 1280            |
| 35             | <i>Staphylococcus aureus</i> | 2.17        | A        | ++     | 1280            |
| 37             | <i>Staphylococcus aureus</i> | 2.27        | A        | ++     | 1280            |
| 39             | <i>Staphylococcus aureus</i> | 2.13        | A        | ++     | 1280            |
| 43             | <i>Staphylococcus aureus</i> | 2.37        | A        | +++    | 1280            |
| 55             | <i>Staphylococcus aureus</i> | 2.32        | A        | +++    | 1280            |
| 60             | <i>Staphylococcus aureus</i> | 2.17        | A        | ++     | 1280            |

**Table S2.** Antimicrobial susceptibility profile of *Staphylococcus aureus* strains used in this study.

| Isolates                  |                                  | 30 | 34 | 35 | 37 | 39 | 43 | 55 | 60 |
|---------------------------|----------------------------------|----|----|----|----|----|----|----|----|
| Antibiotics               |                                  |    |    |    |    |    |    |    |    |
| Penicillins               | Penicillin(P,10units)            | R  | R  | R  | R  | R  | R  | R  | R  |
|                           | Oxacillin(OX,30)                 | R  | R  | R  | R  | R  | I  | R  | R  |
|                           | Cefoxitin(FOX, 30µg)             | R  | R  | R  | R  | R  | R  | R  | R  |
| Glycopeptides             | Vancomycin(V,30 µg)              | R  | R  | S  | S  | S  | R  | R  | R  |
| Aminoglycosides           | Gentamicin(CN,10µ)               | R  | R  | R  | R  | R  | R  | R  | R  |
|                           | Amikacin(AK,30µg)                | R  | S  | R  | R  | S  | R  | R  | R  |
|                           | Tobramycin(TOB,10µg)             | R  | R  | R  | R  | R  | R  | R  | R  |
|                           | Azithromycin(AZM,15µg)           | R  | R  | S  | R  | S  | R  | R  | R  |
| Macrolides                | Clarithromycin(CLR,15 µg)        | R  | R  | R  | R  | S  | R  | R  | R  |
| Tetracyclines             | Erythromycin(E,15 µg)            | R  | R  | R  | R  | S  | R  | R  | R  |
|                           | Tetracycline(TE,30 µg)           | R  | S  | R  | R  | R  | R  | R  | R  |
|                           | Ciprofloxacin(CIP,5 µg)          | R  | R  | R  | R  | R  | R  | R  | R  |
| Fluoroquinolones          | Levofloxacin(LEV,5 µg)           | R  | R  | R  | R  | R  | R  | R  | R  |
| Lincosamides              | Norfloxacin(NOR,10 µg)           | R  | R  | R  | R  | R  | R  | R  | R  |
|                           | Clindamycin(DA,2 µg)             | R  | R  | R  | R  | S  | R  | R  | R  |
|                           | Suflamethoxazole-                |    |    |    |    |    |    |    |    |
| Folate pathway inhibitors | Trimethoprim(SXT 1.25/23.75 µg); | S  | R  | S  | S  | R  | I  | S  | S  |
| Phenicol                  | Chloramphenicol (C,30 µg)        | S  | S  | R  | S  | S  | S  | S  | R  |

---

|                    |                          |   |   |   |   |   |   |   |   |
|--------------------|--------------------------|---|---|---|---|---|---|---|---|
| Ansamycin<br>s     | Rifampin<br>(RA,5 µg)    | R | S | R | R | S | R | R | R |
| Oxazolidin<br>ones | Linezolid(L<br>ZD,30 µg) | S | R | R | R | R | R | R | R |

---

\*R: Resistant, I: Intermediate, S: sensitive.
